# Supplementary material
Source: Springer Nature journal article supplement (https://www.springermedizin.de/resource/supplementary/12913_2006_535_MOESM2_ESM.pdf/9534960)
Supplement: MOESM2 [file 9534960]

2406 Abstracts Reviewed

491 Full Articles Reviewed

115 Articles  
Included in Review

51—Variations in  
care

34—Geographic  
Distribution

30—Insurance  
Factors
